# Supplementary material
Source: bioRxiv or medRxiv preprint supplement (https://www.biorxiv.org/highwire/filestream/6591/field_highwire_adjunct_files/14/024869-5.pdf)

Sex  Female  Male

Linkage Map Position (cM)

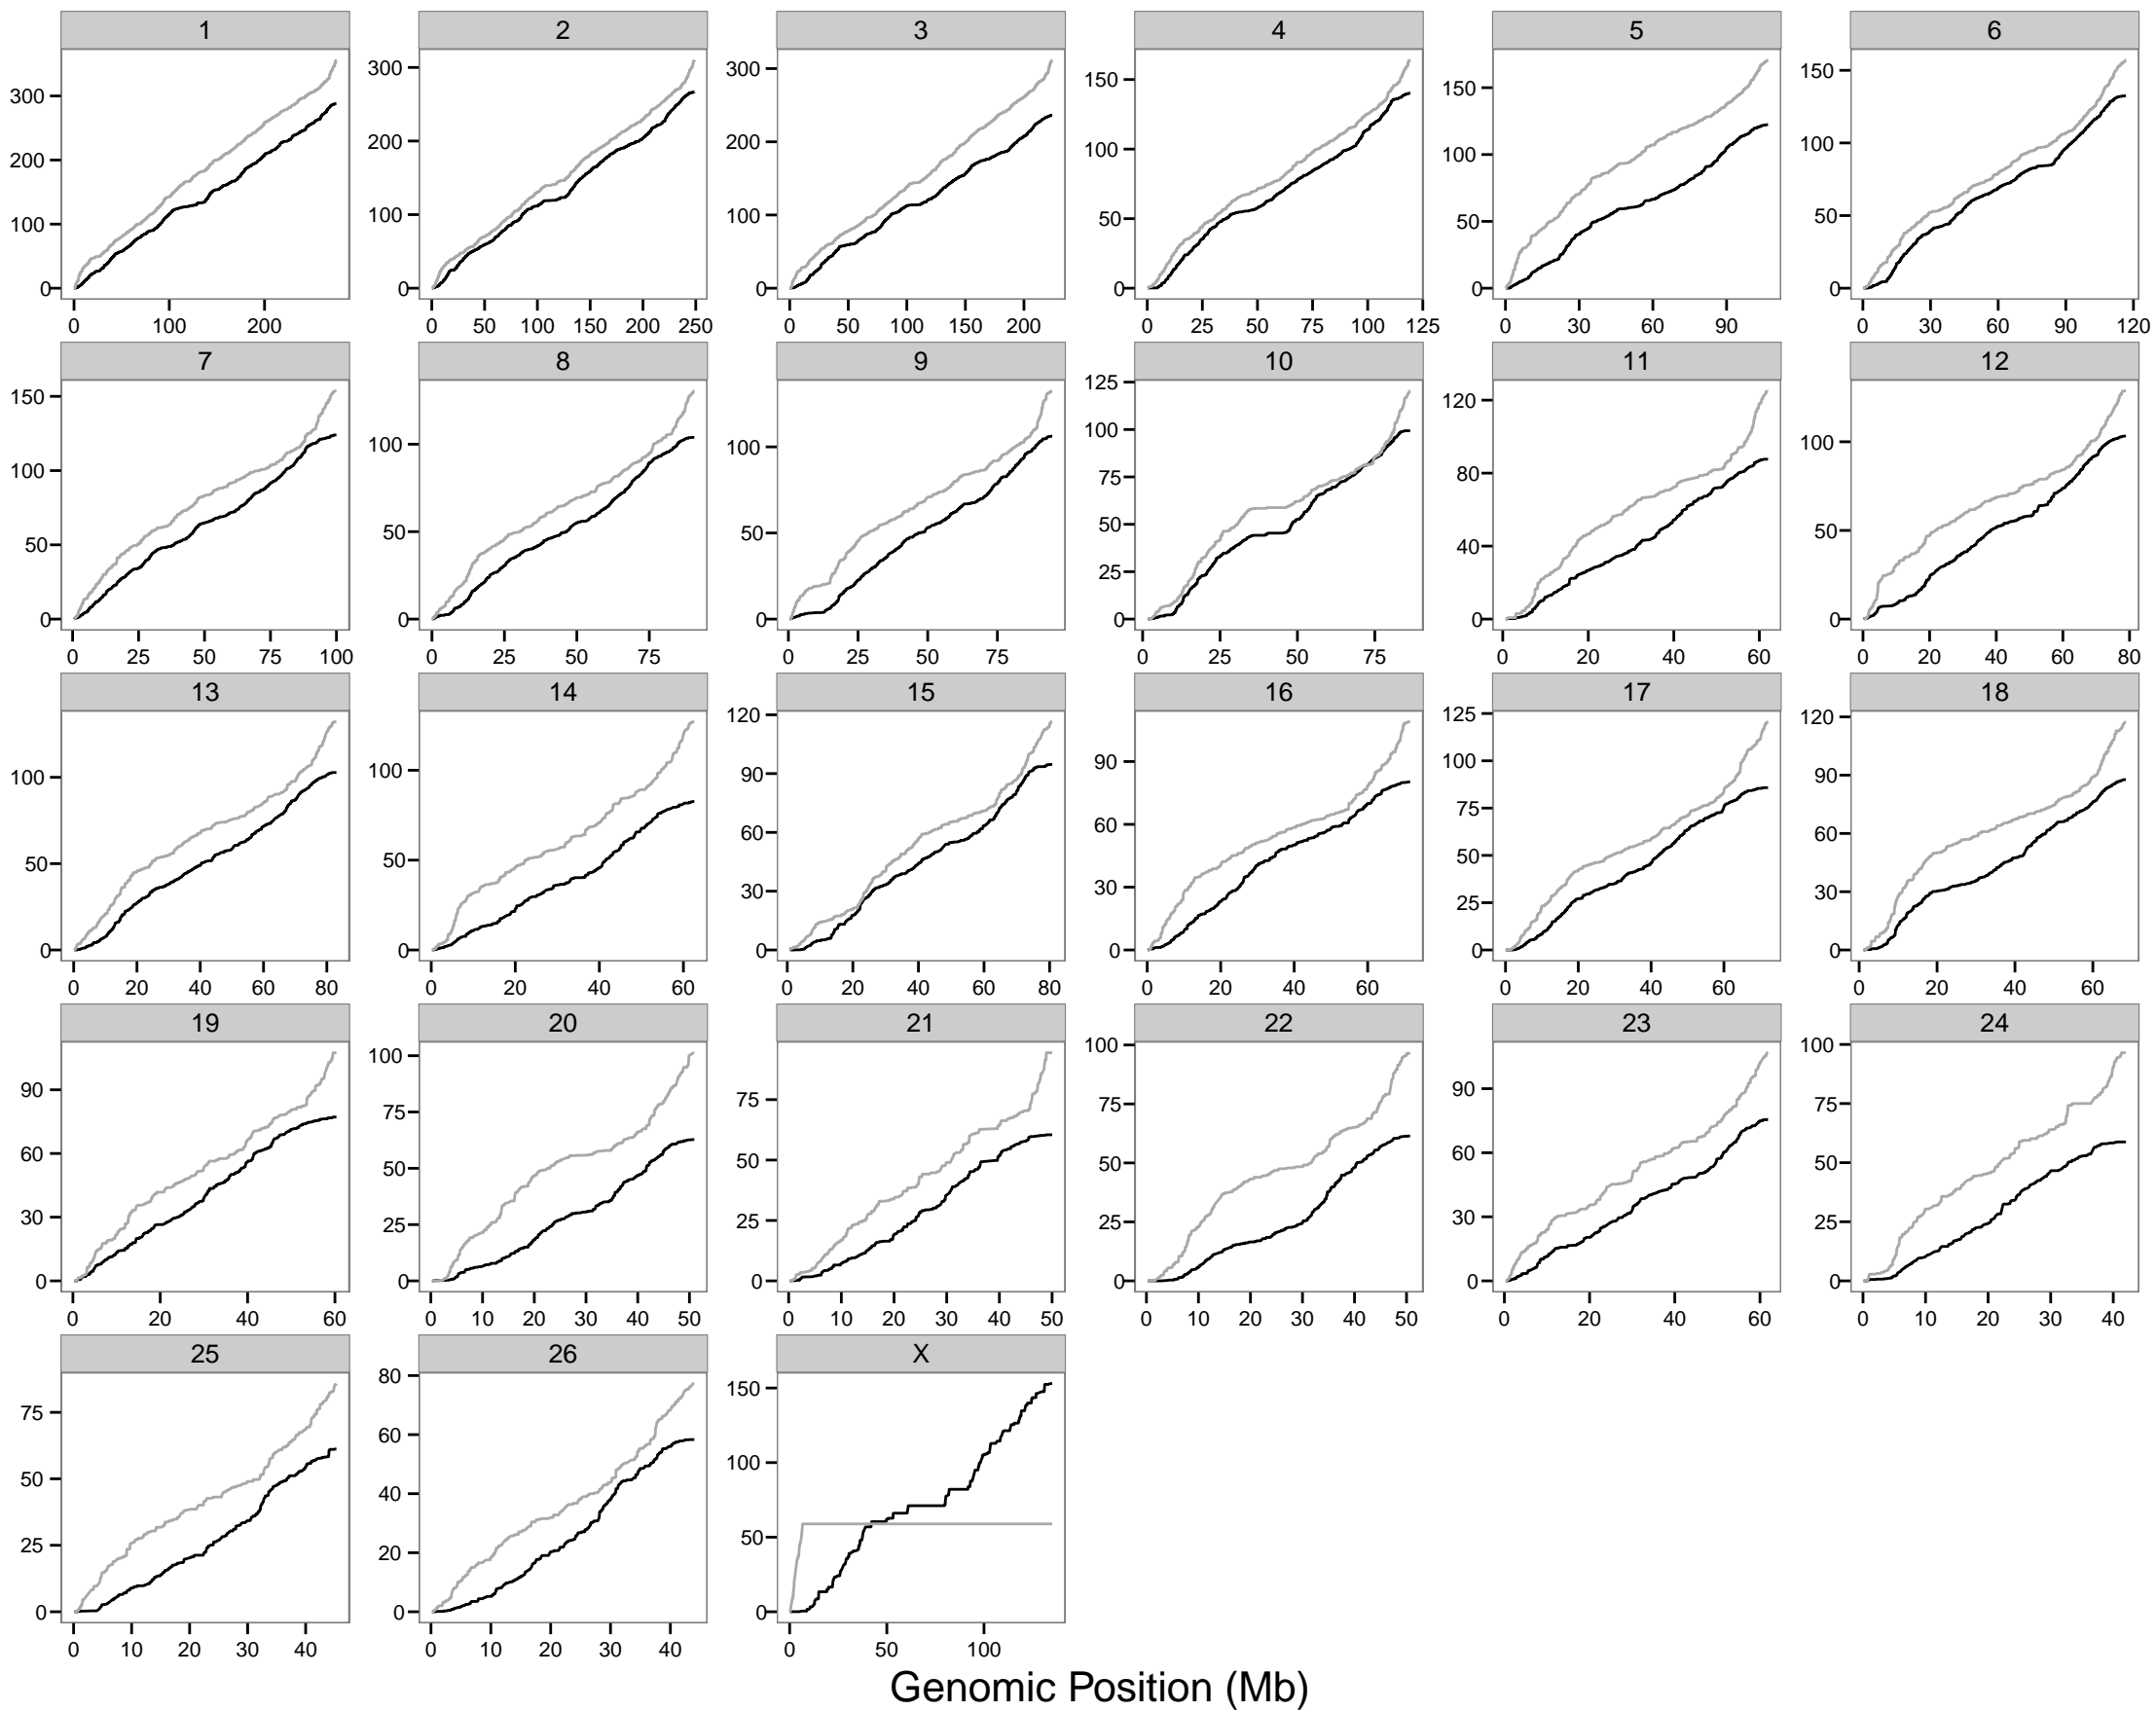

Supplement: Supplementary file [file 024869-5.pdf]
